# Supplementary material for: Dishevelled controls bulk cadherin dynamics and the stability of individual cadherin clusters during convergent extension
Source: PubMed Central journal article supplement — Mol Biol Cell. 2022 Nov 18;33(14):br26. doi: 10.1091/mbc.E22-06-0194 (PMC9727802; doi:10.1091/mbc.e22-06-0194), 2022-11-18

Supplementary Materials  
*Molecular Biology of the Cell*  
Huebner and Wallingford

## **Supplemental figure legends**

### **Supplemental Figure 1: Cdh3 turnover is not changed in the presence of Xdd1**

- A.** Time series of a single junction labeled with Cdh3 that is bleached and then allowed to recover.
- B.** Graph showing the bleach recovery for Cdh3 in control cells or cells expressing Xdd1. Conditions were statistically compared using a Kolmogorov-Smirnov test and were not significantly different.
- C.** Graph comparing the recovery halftime of Cdh3 for control or Xdd1 expressing cells. Conditions were not significantly different as assessed by a Mann Whitney test.
- D.** Graph comparing the mobile fraction of Cdh3 for control and Xdd1 expressing cells. Conditions were compared using a Mann Whitney test and there was no significant difference.

### **Supplemental figure 2: Negative controls for cluster analysis.**

- A.** Still frame from a time lapse movie labeled with a membrane marker shown in blue. Teal lines highlight the junction that is displayed as a kymograph in Supp. Fig.2A'.
- A'.** Kymograph showing the membrane marker over a 400 second time interval.
- A''.** Time smoothed kymograph of the image shown in Supp. Fig.2A'
- A'''.** Kymograph of the membrane marker after thresholding and converting to objects.
- B.** Still frame from a time lapse movie of the Cdh3-cis-mutant shown in green. Blue lines highlight the junction that is displayed as a kymograph in Supp. Fig.2B'.
- B'.** Kymograph showing the Cdh3-cis-mutant over a 400 second time interval.
- B''.** Time smoothed kymograph of the image shown in Supp. Fig.2B'
- B'''.** Kymograph of the Cdh3-cis-mutant after thresholding and converting to objects.

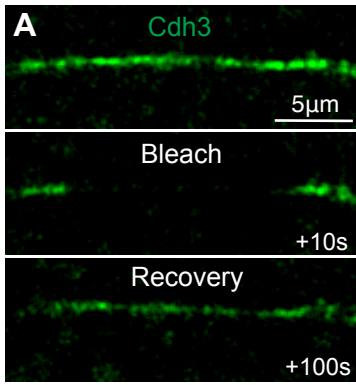

**B** Fluorescence recovery after bleaching

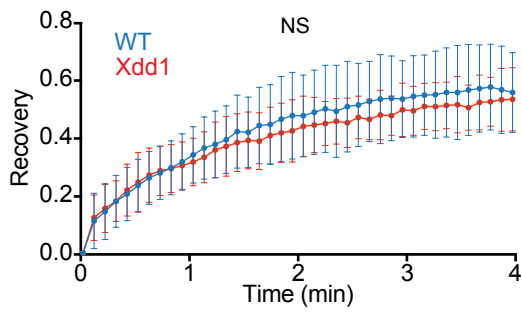

**C** Halftime

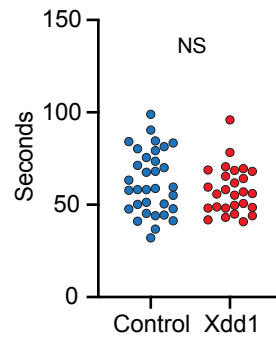

**D** Mobile fraction

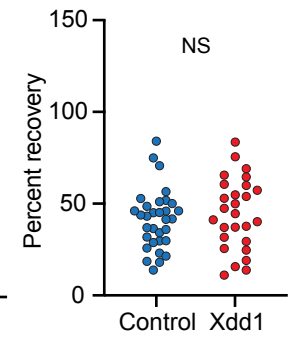

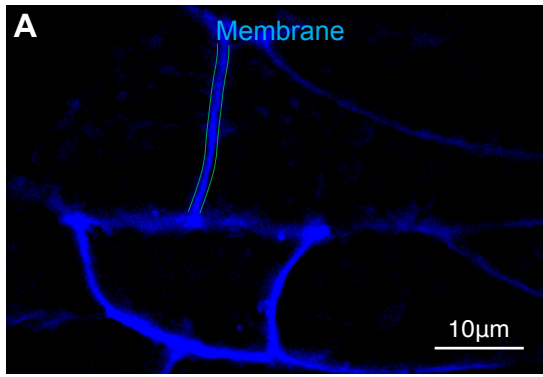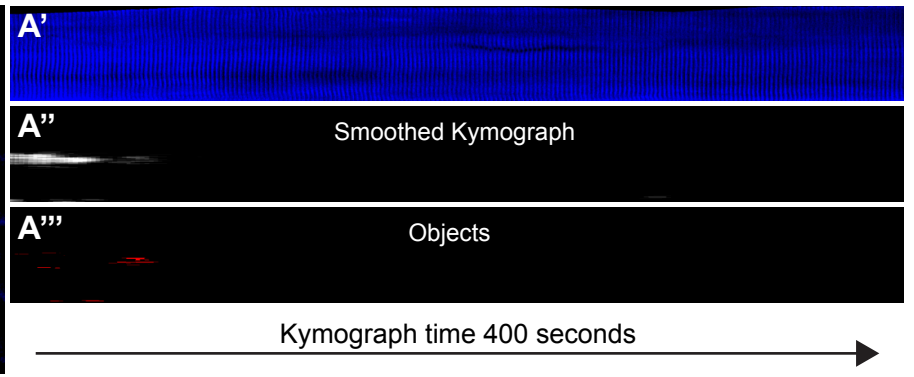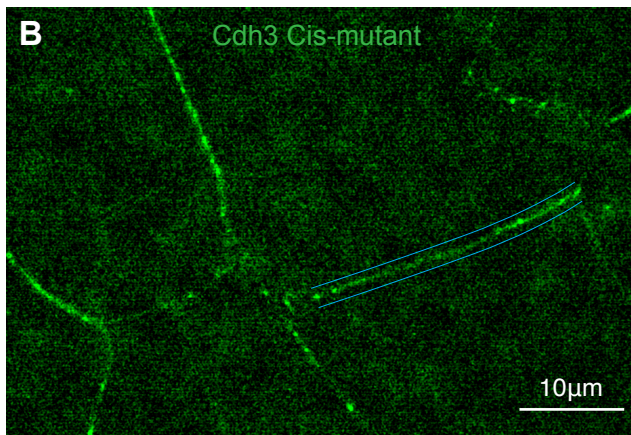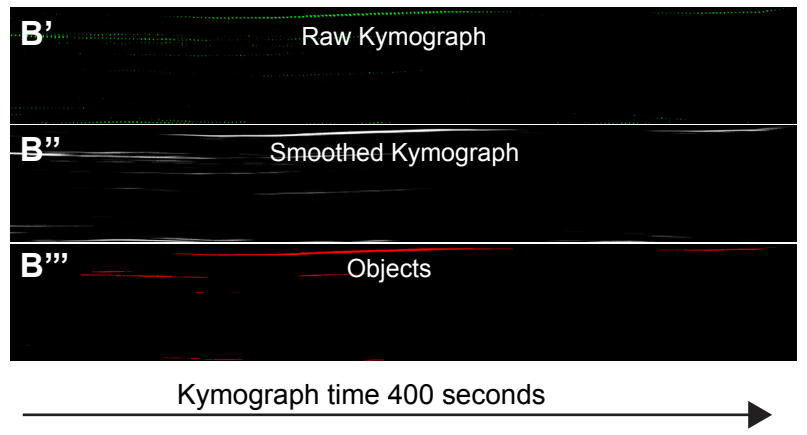

Supplement: mbc-33-br26-s001.pdf [file mbc-33-br26-s001.pdf]
